# Supplementary material for: A novel high-strength photoluminescent hydrogel for tissue engineering
Source: Royal Society of Chemistry journal article supplement (doi:10.1039/c8bm00481a), 2018-01-01
Supplement: c8bm00481a3.pdf [file c8bm00481a3.pdf]

# Supporting Information

## A novel high-strength photoluminescent hydrogel for tissue engineering

*HuiZhi, XuFei,\* Jing Tian,\*Liyuan Zhao, Haiyang Zhang,Muzi Jing, LongquanXu, Yi Wang, and Yao Li\**

**The supporting information includes,**

**Figure S1.** (a) The  $^1\text{H}$  spectrum of Eu-PVAc, (b) the  $^{13}\text{C}$  spectrum of Eu-PVAc.

**Figure S2.** (a) EDS spectrum, (b) mapping of Eu-PVAc.

**Figure S3.** The first, second, third, fourth and fifth loading stress-strain curves of (a) Sol-Eu-3 gel, (b) Fre-Eu-3 gel and (c) Exc-Eu-3 hydrogel. (d) Comparison of elastic modulus of Sol-Eu-3 gel, Fre-Eu-3 gel among the first, second, third, fourth and fifth immediate loadings.

**Figure S4.** The swelling properties of the Exc-Eu hydrogels.

**Figure S5.** DSC curves and TGA curves of the Exc-Eu-hydrogels.

**Table S1.** Water content of the different quality Exc-Eu hydrogels.

**Movie S1.** The Exc-Eu-3 hydrogel under car pressure with 385 nm UV light.

**Movie S2.** 1 kg weight was lifted up by the Exc-Eu-3 hydrogel without fracture.

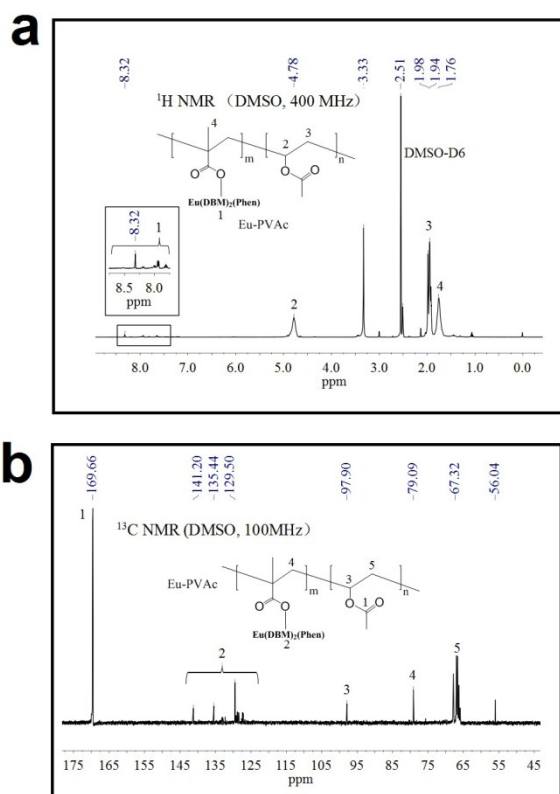

**Figure S1.** (a) The <sup>1</sup>H spectrum of Eu-PVAc, (b) the <sup>13</sup>C spectrum of Eu-PVAc.

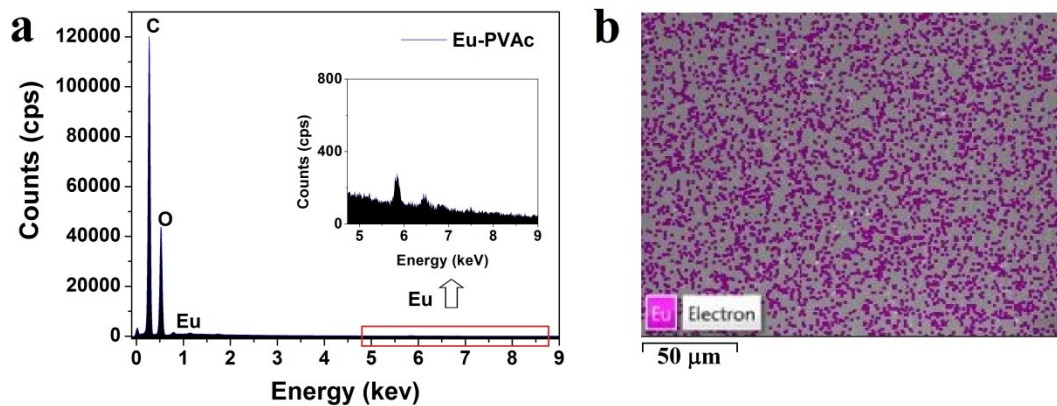

**Figure S2.** (a) EDS spectrum, (b) mapping of Eu-PVAc.

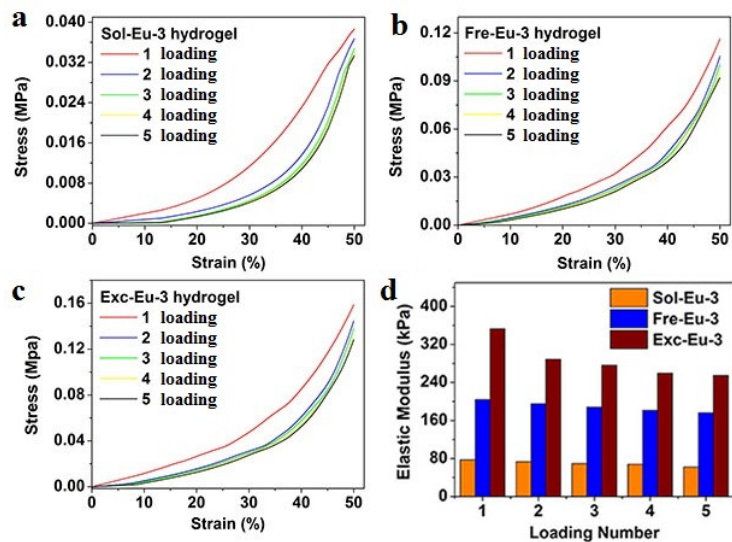

**Figure S3.** The first, second, third, fourth and fifth loading stress-strain curves of (a) Sol-Eu-3 gel, (b) Fre-Eu-3 gel and (c) Exc-Eu-3 hydrogel. (d) Comparison of elastic modulus of Sol-Eu-3 gel, Fre-Eu-3 gel and Exc-Eu-3 among the first, second, third, fourth and fifth immediate loadings.

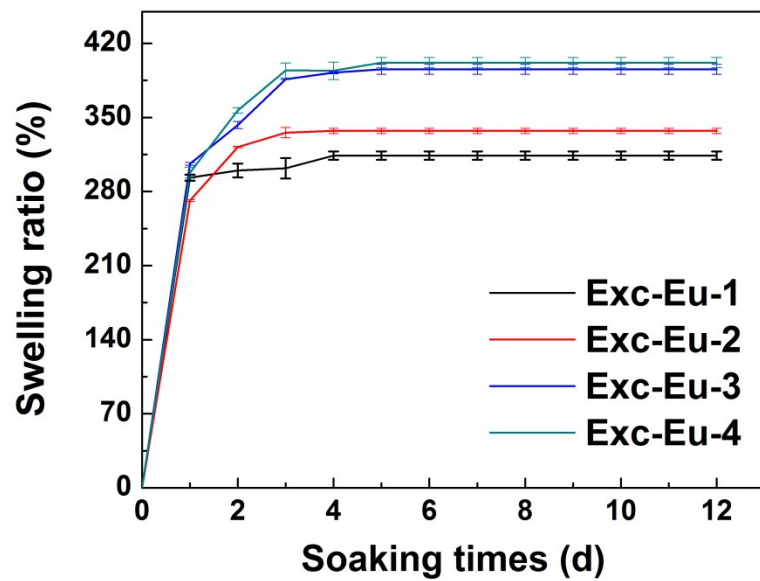

Figure S4. The swelling properties of the Exc-Eu hydrogels.

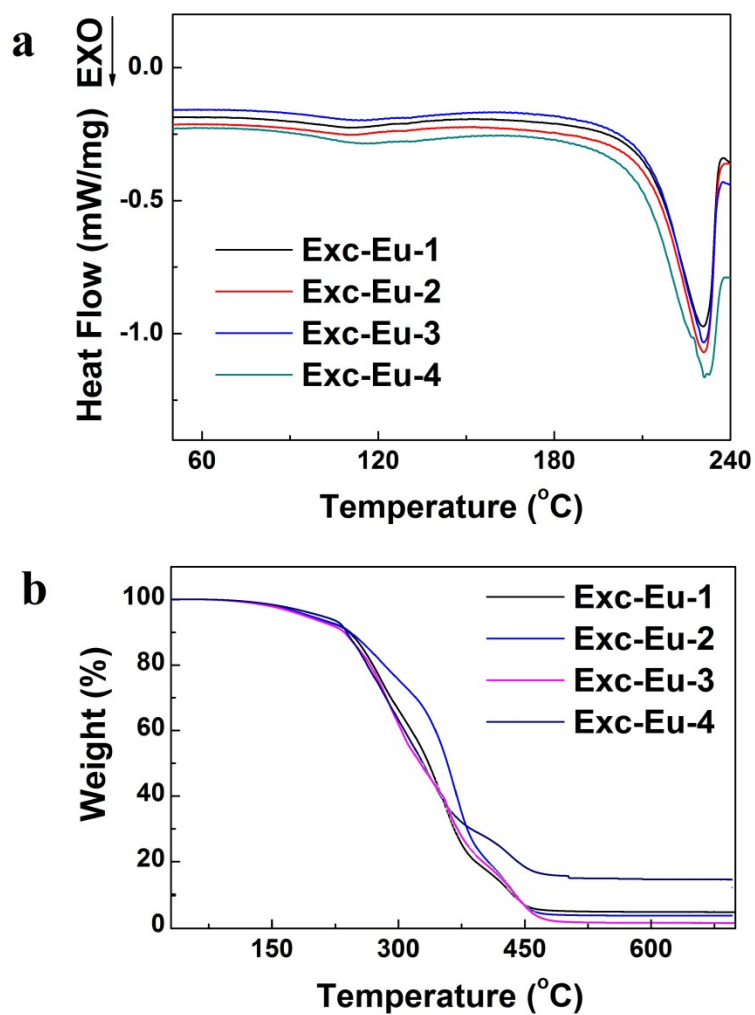

**Figure S5.** DSC curves and TGA curves of the Exc-Eu-hydrogels.

**Table S1.** Water content of the different quality Exc-Eu hydrogels.

| <b>Hydrogel</b> |                      | <b>Weight</b> |       |       |       |       | <b>Water</b>   |
|-----------------|----------------------|---------------|-------|-------|-------|-------|----------------|
|                 |                      | <b>(g)</b>    |       |       |       |       | <b>content</b> |
|                 |                      |               |       |       |       |       | <b>(%)</b>     |
| <b>Exc-Eu-1</b> | <b>W<sub>0</sub></b> | 2.330         | 2.266 | 2.249 | 2.208 | 2.223 | 90.25±0.96     |
|                 | <b>W<sub>1</sub></b> | 0.232         | 0.201 | 0.235 | 0.191 | 0.241 |                |
| <b>Exc-Eu-2</b> | <b>W<sub>0</sub></b> | 2.242         | 2.254 | 2.232 | 2.261 | 2.254 | 89.01±0.57     |
|                 | <b>W<sub>1</sub></b> | 0.240         | 0.232 | 0.242 | 0.264 | 0.258 |                |
| <b>Exc-Eu-3</b> | <b>W<sub>0</sub></b> | 2.261         | 2.246 | 2.253 | 2.235 | 2.250 | 88.51±1.12     |
|                 | <b>W<sub>1</sub></b> | 0.278         | 0.232 | 0.230 | 0.277 | 0.275 |                |
| <b>Exc-Eu-4</b> | <b>W<sub>0</sub></b> | 2.252         | 2.254 | 2.256 | 2.264 | 2.259 | 88.67±0.95     |
|                 | <b>W<sub>1</sub></b> | 0.271         | 0.235 | 0.280 | 0.261 | 0.232 |                |

**W<sub>0</sub>**: the weight of the hydrogels before drying;

**W<sub>1</sub>**: the weight of the hydrogels at the dry state.
